# Supplementary material
Source: Research Square preprint supplement (doi:10.21203/rs.3.rs-9874749/v1)
Supplement: Supplementary file 1 [file fed07e67d73e79688125e0e3.docx]

Supplementary Materials for

**A physics-grounded tactile representation for generalizable contact-rich manipulation**

Baihui You1,2,3, Yifeng Tang1,2,3, Jinzhao Yang1,4, Yajing Shen1,2,3*

1. Department of Electronic and Computer Engineering, The Hong Kong University of Science and Technology, Hong Kong, China
2. Cheng Kar-Shun Robotic Institute, The Hong Kong University of Science and Technology, Hong Kong, China
3. HKUST Shenzhen Research Institute, Shenzhen, China
4. School of Aeronautics and Astronautics, Sun Yat-sen University, Shenzhen 518107, China

Corresponding Author: Yajing Shen ([eeyajing@ust.hk](mailto:eeyajing@ust.hk))

**The PDF file includes:**

Supplementary Text

Figs. S1 to S3

Tables S1 to S2

**Other supplementary Materials for this manuscript include the following**

Movies S1 to S4

**Supplementary Text**

**S1. Dynamic Constraints Analysis for Stable Grasping**

This section establishes the physical motivation for the tactile sensor design by deriving the dynamic stability boundaries for a grasped object. To ensure stability during manipulation, the contact forces must be regulated to remain within the friction cone, necessitating real-time feedback of the contact center's state (related to Fig. 2A).

**S1.1 Kinematics and Dynamic Model**

Let denote the inertial world frame. The position of the effective contact center (frame ) is , and the position of the object's center of mass (frame ), with mass , is . The relative position vector is denoted by . Their kinematic relationship is:

The dynamics of the object are governed by Newton's second law, where is the net contact force from the gripper, and is the gravity vector:

By differentiating the kinematic equation twice and substituting it into the dynamic equation, we obtain the general dynamic model:

**S1.2 Stable Acceleration Envelope**

The primary condition for a stable grasp is the absence of relative motion (slip) at the contact interface, which strictly implies zero relative acceleration (). Under this critical assumption, the required contact forces to generate a desired manipulation acceleration are:

For the grasp to be maintained, these contact forces must remain within the friction cone. Assuming the gripper system provides a maximum normal force and a static friction coefficient , the sustainable forces are bounded by:

By substituting the dynamic relationships into these force constraints, we translate the force-space stability bounds into an equivalent acceleration-space stability envelope:

Any planned trajectory for the gripper must ensure its acceleration profile remains strictly within this rectangular region. This derivation highlights that without real-time estimation of the contact center's state, unmodeled dynamics will cause deviations from the planned path, violating the stability envelope and resulting in immediate slip.

**S2. Forward Physical Model and Local Sensitivity**

This section details the continuous, differentiable forward model constructed to assess the observability of the tactile state. We model the soft elastomer layer as a semi-infinite elastic half-space, utilizing the classical Boussinesq-Cerruti contact mechanics framework to map surface forces to internal stress distributions.

**S2.1 Boussinesq-Cerruti Stress Field and Measurement Model**

Consider a 3D point force vector applied at a surface contact position . The sensor array consists of sensing units embedded at a uniform depth . The horizontal coordinate of the -th sensing unit is denoted as .

To express the spatial decay of the stress field, we define a dimensionless normalized planar distance . The dimensionless response functions are defined as:

Let denote the measured 3D magnetic flux density at the -th unit. Assuming a linear transduction mapping from the local stress field to the magnetic dipole response, the measurement model is formulated as:

Here, is the lumped sensitivity constant incorporating the effective sensor area , and represents additive Gaussian measurement noise.

**S2.2 Local Sensitivity (Jacobian) Matrix**

For single-point contact, the physical state is parameterized as . The mapping from this state to the measurement space is governed by the Jacobian matrix . The partial derivatives of the response functions with respect to the contact position are analytically derived as:

(Derivatives for follow symmetrically). Identifiability requires , hence .

**S3. Observability Analysis and Topological Optimization**

While satisfies the dimensionality constraint, we rigorously prove its vulnerability to singular configurations and establish the necessity of an square array.

**S3.1 Proof of Singularities in Minimal Configurations ()**

To demonstrate the limitations of , consider the position sub-Jacobian derived purely from the z-components of the two sensors. Its determinant is proportional to:

where is the angle between the vectors and . Singularities () occur when or (contact exactly at a sensor location), or when or (contact is collinear with both sensors). To robustly eliminate all such interior singular configurations, units are required, ensuring at least two units provide for any arbitrary contact position.

**S3.2 Fisher Information Matrix and Square Optimality Proof**

To evaluate configurations for , we utilize the Fisher Information Matrix (FIM), . By rotational invariance, the optimal layout must exhibit symmetry. We analytically compare the Diamond () and Square () arrangements.

For a centered contact (), both topologies yield an isotropic position FIM: . To test robustness, we introduce a small off-center displacement along the x-axis (). We expand the normalized squared distance to the first order:

- **Diamond Layout ()**: Sensors are located at and . The maximum distance variation occurs at the x-axis sensors: .
- **Square Layout ()**: Sensors are located at . All sensors experience a maximum distance variation bounded by: .

The Square configuration guarantees a times smaller perturbation in spatial distance, resulting in vastly more uniform FIM eigenvalues. Numerical integration over the domain confirms the Square layout suppresses the maximum condition number to , outperforming the Diamond layout () by 19%.

**S4. Bimodal Stress Parameterization for Extended Contacts**

For extended objects, the state is re-parameterized into a bimodal stress field: , assuming symmetric loading (). The orientation and spatial separation are derived as:

**S4.1 Analytical Proof of Two-Point Resolvability Limit**

By superposition, the combined stress field along the inter-contact axis (assuming contacts at ) is:

To resolve the contacts, a measurable "central dip" must exist. We calculate the stress at the midpoint () and near the peaks ():

The dip depth is . For small separations (), taking the Taylor expansion of yields the asymptotic approximation:

Detectability requires . Substituting the Signal-to-Noise Ratio () leads to the fundamental resolution bound:

For , this asymptotes to , strictly defining the intrinsic spatial diffusion limit of the elastomer layer.

**S4.2 Orientation Error Propagation**

Using first-order error propagation, the variance in the estimated orientation angle () relies heavily on the spatial separation :

This explicitly proves that contacts with larger spatial footprints inherently provide greater geometric leverage, suppressing orientation uncertainty.

**S5. Joint Minimax Optimization for Inter-sensor Spacing**

To optimize the inter-sensor spacing , we first define the single-unit position information limit. From the z-component derivative, maximizing yields:

While an optimal point-focus requires , this ignores array-level domain coverage.

Single-point localization () strictly favors a larger to maximize the baseline force-moment leverage. Conversely, two-point orientation resolution () requires a smaller to adequately sample the high-frequency spatial gradients (the central dip). We formulate a joint minimax optimization across both modes:

Numerical evaluation reveals the optimal theoretical balance occurs exactly at . For our system ( mm), this derivation firmly establishes mm as the optimum.

**S6. Analytic Decoupling of the Tactile State and External Forces**

This section presents the analytic decoupling pipeline to estimate the Center of Mass (CoM) and external manipulation forces utilizing the distributed triaxial force measurements from the sensor array (related to Fig. 2F).

**S6.1 Center of Mass Estimation (Without External Force)**

Let the unknown CoM be located at . The coordinates of the four force sensing units are defined as for , and their corresponding measured normal forces are . Under static equilibrium with only gravity acting on the object mass , the moment equilibrium equations about the x-axis and y-axis are respectively:

Thus, the baseline position of the center of mass can be explicitly determined solely from the force and coordinate measurements of the sensor array.

**S6.2 External Force and Center of Pressure Estimation**

Now consider the presence of an applied external force vector acting at an unknown point of application . Let , , and denote the triaxial force components measured by the -th sensor. To solve for the five unknowns (), we establish five independent spatial equilibrium equations.

The translational force balances in the x, y, and z directions yield:

For rotational equilibrium, the moments about the x-axis and y-axis must balance. Utilizing the previously determined CoM , the moment balance equations are:

By combining these five equilibrium equations, the analytic pipeline can independently resolve the external force components as well as pinpoint their application coordinate , fully decoupling the complex tactile interaction state.

**S7. Fabrication Process of the Tactile Sensor Array**

This section details the step-by-step manufacturing and assembly protocol for the soft magnetic tactile sensor, ensuring precise mechanical-to-magnetic transduction and structural robustness **(Fig. S1)**.

**S7.1 Elastomer Preparation and Initial Molding**

The soft elastomer matrix is fabricated using Dragon Skin 30 silicone. Parts A and B of the liquid silicone are mixed in a strict 1:1 weight ratio and stirred thoroughly. To ensure a completely defect-free internal structure and eliminate air inclusions that could perturb the magnetic field or alter local elasticity, the mixture is subjected to vacuum degassing in a vacuum chamber. The degassed liquid silicone is then poured into a custom precision mold designed to shape the primary tactile block. This mold incorporates specific geometric features to form four precise cavities intended for the subsequent placement of magnets. The silicone is then left to cure for 1 to 8 hours, establishing the foundational structural layer.

**S7.2 Magnet Encapsulation and Monolithic Curing**

Following the initial curing phase, four specified cylindrical permanent magnets are precisely embedded into the pre-molded cavities using tweezers. The magnets are arranged in a strict square topology at the four corners of the active sensing domain, with careful attention paid to their vertical magnetic pole orientation (N/S). Once the magnets are securely positioned, a secondary pouring of freshly mixed and degassed Dragon Skin 30 silicone is applied over the assembly. This step fully encases the magnets within the matrix. The sensor block undergoes a secondary curing process, which seamlessly bonds the new liquid layer with the previously cured base to form a unified, monolithic magnetic silicone block.

**S7.3 Structural Assembly and PCB Integration**

The fully cured magnetic elastomer block is subsequently extracted from the mold and securely bonded to a custom-designed rigid base structure. The final, and most critical, phase of the assembly involves the integration of the printed circuit board (PCB). The custom PCB, which houses the high-resolution tri-axis Hall-effect sensing units, is inserted into the base structure directly beneath the elastomer block. The mechanical tolerance of the base design guarantees strict vertical alignment between the four embedded magnets in the soft silicone and the four corresponding Hall sensors on the PCB. This exact spatial registration is fundamentally essential to ensure the accuracy of the forward physical measurement model and the reliability of the system's real-time analytical decoupling algorithms.

**S8. Experimental Validation of Localization Performance**

To validate the theoretical performance bounds of the tactile sensor array and evaluate the influence of the Signal-to-Noise Ratio (SNR), we conducted contact localization calibration experiments under varying normal loads (2 N, 5 N, and 8 N).

**S8.1 Experimental Procedure and Statistical Results**

A motorized indenter was utilized to systematically probe the sensor surface across a predefined spatial grid (coordinate range: mm). For each specified force level, a total of 289 data points were collected. The contact positions estimated by our analytic decoupling pipeline were then compared against the motorized ground truth to compute the Overall Mean Absolute Error (MAE) per dimension and the combined Localization Root Mean Square Error (RMSE).

The statistical results for the three load conditions are summarized in Table S1. As predicted by the theoretical observability framework, both the MAE and RMSE decrease monotonically with increasing applied normal force, confirming that higher loads elevate the effective SNR of the magnetic flux signals and suppress state estimation uncertainty.

As explicitly predicted by our theoretical observability framework, the localization accuracy significantly improves as the applied normal force increases. The higher force directly elevates the spatial stress gradients and the corresponding magnetic flux signals, thereby increasing the effective SNR and suppressing the state estimation uncertainty.

**S9. Angle Detection Calibration Experiment**

**S9.1. Experimental objective**

The angle detection calibration experiment was conducted to systematically evaluate the orientation estimation accuracy of the sensor across a diverse set of fundamental contact geometries and scales. By utilizing reference objects with precise ground-truth angles, this experiment quantifies the generalization capability of the analytical decoding pipeline when encountering various physical boundaries and contact area footprints.

**S9.2. Apparatus description**

As illustrated in Fig. S2A, the experimental setup comprises three primary components. First, a precision linear actuator controls the vertical indentation, ensuring controlled and repeatable contact between the test object and the tactile sensor surface. Second, a high-precision rotary stage serves as the ground-truth reference, allowing the test object to be rotated to specific, known angles relative to the principal axes of the sensor prior to contact. Third, a custom object gripper is mounted to the actuation system to securely hold the various test objects, ensuring perfect alignment of their rotational axes with the rotary stage.

**S9.3. Test objects**

To rigorously evaluate the robustness of the orientation estimation, 15 reference objects were fabricated. As shown in the representative subset (Fig. S2B), these objects were designed as 3D extruded geometric primitives to simulate common structural boundaries encountered in robotic manipulation. The test set encompasses polygonal profiles (e.g., triangular, square, rectangular, hexagonal, and octagonal cross-sections) featuring sharp vertices and flat edges, as well as curved profiles (e.g., semi-cylindrical and rounded rectangular) with continuous or semi-continuous boundaries. The characteristic dimensions (e.g., width or diameter) of these cross-sections vary systematically to assess the sensor's performance across different spatial contact footprints.

**S9.4. Experimental procedure**

The calibration procedure was standardized across all test objects. First, a specific test object is secured in the gripper. The rotary stage is then adjusted to set the object to a predefined ground-truth angle (), starting from 0° and sweeping up to 360° in 10° increments. For each orientation, the linear actuator drives the object vertically into the sensor until a target normal force is reached, establishing a stable contact footprint. Raw magnetic flux signals are recorded, and the Hierarchical Tactile Processing (HTP) pipeline analytically decodes the estimated contact footprint orientation (). The absolute orientation error is calculated as . This process is repeated across all specified angles and all 15 objects to generate a comprehensive statistical distribution of the angular error.

**S9.5. Calibration results**

The quantitative calibration results demonstrate exceptional accuracy across all tested geometric profiles, orientations, and scales. As depicted in Fig. S8B, the estimated orientations exhibit a near-perfect linear correlation with the ground-truth angles, with the coefficient of determination (*R*²) strictly exceeding 0.999 for all evaluated objects. Across the complete calibration dataset—covering 15 objects swept from 0° to 360° in 10° increments—the overall mean absolute error (MAE) is 0.605° ± 0.398° (Table S2C).

A consistent trend is observed across angle bins (Table S2A): estimation errors are generally lowest at near-horizontal and near-vertical orientations (e.g., 150–180°: MAE < 0.17°), and peak in the 40–50° and 130–150° diagonal regions (MAE up to 1.42°). This anisotropy arises from the spatial symmetry of the square sensor array, where diagonal contact orientations produce less differentiated inter-sensor flux gradients.

Object scale also significantly influences accuracy (Table S2B): objects with larger characteristic dimensions (e.g., 8 mm octagonal prism: MAE = 0.384°) consistently outperform smaller counterparts (e.g., 2 mm quadrangular prism: MAE = 0.763°). This improvement is attributed to the broader spatial contact footprint, which provides a higher effective SNR for extracting stress gradients.

The full statistical summary, including the maximum and minimum observed errors, is provided in Table S2C. Overall, these results confirm that the analytical decoding pipeline robustly and accurately extracts contact orientation independently of the specific underlying object geometry.

**S10. Robust Contact Detection and Signal Conditioning**

**S10.1. Signal Preprocessing and Baseline Adaptation**

To ensure high-fidelity state estimation, raw magnetic flux density signals are first conditioned to suppress high-frequency electromagnetic interference and low-frequency environmental drift. An Exponential Weighted Moving Average (EWMA) filter is applied to the raw 12-dimensional measurement stream:

where the smoothing factor is typically set to 0.3. To decouple the external interaction force from the quasi-static background field, we implement a variance-gated baseline adaptation strategy. The baseline is updated only when the local signal variance remains below a stability threshold for a continuous window . The normalized interaction signal is then defined as , ensuring that the system remains zero-referenced despite long-term sensor drift or thermal fluctuations.

**S10.2. Multi-Feature Fusion for Contact Estimation**

Traditional single-threshold detection methods are susceptible to false positives induced by motor vibrations or missed detections during soft, gradual contacts. We address this by extracting three complementary physical features from :

1. **Amplitude Criterion ():** Captures quasi-static load levels. A contact is suspected if the signal magnitude exceeds a dynamic threshold derived from the baseline noise floor:
2. **Temporal Gradient Criterion ():** Detects rapid impact onsets characteristic of initial collision. This is formulated as the first-order derivative of the signal:
3. **Relative Change Criterion ():** Enhances sensitivity to slow, low-magnitude interactions by monitoring the ratio of change:

The hybrid event estimator confirms a potential contact if a weighted combination of these criteria is met, typically requiring or if crosses a safety "hard" threshold.

**S10.3. Hysteresis-Based State Machine and Temporal Gating**

To prevent state chattering (rapid oscillation between contact and non-contact states) near the decision boundary, we implement a state machine governed by a dual-threshold hysteresis band and temporal persistence checks.

The transition from Off to Pressed (Pressing phase) requires the fusion signal to stay above the *On-threshold* () for a minimum duration . Conversely, the transition from Pressed to Off (Releasing phase) occurs only when the signal drops below a lower *Off-threshold* () and remains there for .

This hysteresis mechanism, defined as , provides a robust buffer against the mechanical vibrations of the robotic arm and the viscoelastic relaxation of the silicone skin. The temporal gating ensures that high-frequency spikes (e.g., electronic noise) are rejected as spurious transients, providing a clean, "debounce" binary trigger for the downstream K-means peak-localization and 3D force decoupling algorithms.

**S11. Analytical Center of Pressure (CoP) Estimation via Zone-Weighted Interpolation**

The analytical estimation of the Center of Pressure (CoP) is fundamental to achieving high-fidelity tactile perception in contact-rich manipulation tasks. Our approach, the Zone-Weighted Center of Pressure (ZW-CoP) algorithm, is inspired by the biological principle of population coding within human mechanoreceptors, where spatial localization is achieved through the relative activation levels of discrete, overlapping receptive fields. In soft tactile sensors, the elastic silicone matrix inherently diffuses applied forces over a broad area, causing the magnetic flux signals to propagate significantly beyond the actual contact point. A conventional linear barycentric interpolation of raw sensor outputs frequently suffers from the "center-collapse" effect, a phenomenon where the predicted CoP is artificially biased toward the geometric center of the sensor array, severely limiting the sensitivity and accuracy near the peripheral boundaries.

To overcome this physical limitation while ensuring isotropic decoding, where localization accuracy remains uniform across all contact angles, we logically discretize the continuous sensing surface into a symmetric tessellation of 17 distinct receptive zones. This topology is precisely engineered to preserve the rotational and axial symmetry of the underlying square sensor layout, comprising four corners, four edges, four sensor-proximal zones, four inner quadrants, and a single central zone. By transforming the continuous force distribution into these discrete "territories," the algorithm can evaluate the probability of contact falling within specific spatial regions based on the relative intensities of the four tri-axis Hall-effect units.

A critical feature of this framework is the introduction of a bio-inspired, non-linear force-focusing mechanism to sharpen the spatial contrast. For each of the 17 zones, an activation weight is calculated and subsequently transformed by a dominance exponent , yielding a sharpened weight to . This exponent acts as a spatial "soft-max" filter that exponentially amplifies the response of the dominant zone while aggressively suppressing the long-range crosstalk from distant regions. Furthermore, recognizing that the "diffusion radius" of the elastomer varies non-linearly with the applied normal load, our algorithm employs a force-adaptive calibration of . Through extensive automated robotic probing across a high-density grid, we determined that a dynamic , increasing from approximately 1.1 at light loads to 1.8 at higher pressures, optimizes the suppression of viscoelastic interference and minimizes the global localization error.

The final continuous 2D coordinate is reconstructed using a barycentric interpolation scheme, where the sharpened weights are used to blend the fixed geometric centers of the 17 receptive zones. This analytical pipeline avoids the substantial computational overhead and data requirements of deep neural networks, instead relying on structured geometric priors and a minimal one-shot spatial calibration. The resulting estimation sustained a high-frequency update rate of approximately 80 Hz, providing the real-time feedback necessary for reflexive control while maintaining sub-millimeter localization precision across the entire active sensing domain.

**S12. Analytical Mechanism for Angle Generation via Sensor Signal Processing**

This section details the analytical mechanism utilized to process raw magnetic flux signals into robust orientation angles. To ensure continuous real-time control, the methodology transforms discrete sensor readings into a continuous spatial stress field, thereby avoiding the unpredictability of purely data-driven models through a deterministic mathematical formulation.

**S12.1 Signal Projection and Spatial Weighting**

Given the inherent limitation of employing a sparse array of four physical sensors, the spatial clustering mechanism cannot operate directly on the discrete sensor coordinates. Instead, the lateral magnetic signals are projected into a continuous spatial domain as mapped points . To accurately capture the true physical deformation of the contact surface, each projected point is assigned a dynamic weight , which is strictly proportional to the magnitude of the lateral magnetic flux . Consequently, the algorithm evaluates a continuous, weighted shear deformation spatial field, where regions experiencing stronger shear stress exert a proportionally higher "gravitational pull" on the subsequent cluster centroids.

**S12.2 Bimodal Parameterization and Expectation-Maximization (EM) Clustering**

For extended contact geometries, the physical interaction state is re-parameterized into a bimodal stress field. We formulate the stress pole-finding process as a Weighted K-Means spatial optimization. The objective is to minimize the intra-cluster spatial variance , which is governed by the following cost function:

Here, serves as the geometric prior for the bi-polar stress field ( and ), represents the spatial coordinates of the projected vector field points, is the spatial coordinate of the -th centroid, and acts as the indicator function. To minimize , the system employs an Expectation-Maximization (EM) iterative approach. In the E-Step, each spatial point is assigned to the nearest centroid based on Euclidean distance. Subsequently, in the M-Step, the centroids are dynamically recalculated using the weighted spatial average of the assigned points:

Because the state space is tightly bounded by the physical dimensions of the tactile elastomer, this EM algorithm converges extremely fast. The iteration strictly terminates when the change in cost , typically requiring only 3 to 5 iterations. This negligible computational latency is highly optimal for the 100 Hz real-time robotic control loop.

**S12.3 Deterministic Angle Extraction**

Upon successful convergence of the EM algorithm, the optimal spatial coordinates of the two stress poles, and , are analytically obtained. The physical posture angle is then deterministically extracted from the geometric vector formed between these optimized centroids:

This purely analytical derivation guarantees algorithmic transparency and ensures that the orientation estimation is deeply grounded in solid contact mechanics.

**S12.4 Physical Bounds and Geometric Generalization**

The robustness of this EM-based angle generation pipeline is firmly anchored by our physical models. Based on first-order error propagation, the variance in the estimated orientation () is strictly bound by the spatial separation () of the contact footprint, yielding . This mathematically demonstrates that larger contact areas inherently provide greater geometric leverage, suppressing directional uncertainty. Furthermore, resolving the two independent centroids requires a distinct central stress dip. Under high SNR conditions, our analysis confirms that the algorithm operates right up to the intrinsic spatial diffusion limit of . Finally, by clustering the continuous stress field rather than discrete boundary features, the pipeline remains entirely agnostic to the underlying object geometry. As validated across 15 diverse geometric primitives, the deterministically extracted angle maintains an exceptionally linear correlation () with ground-truth orientation, securing sub-degree precision universally.

**S13. Experimental Validation of Dynamic Manipulation and Object Generalization**

This section evaluates the sensor's performance in real-world dynamic manipulation tasks and its generalization capability across everyday objects with varying geometries and material properties **(Fig. S3)**.

**S13.1 Real-Time Tracking During Continuous Manipulation**

To validate the sensor's capability to monitor complex, dynamic physical interactions, we conducted a continuous manipulation experiment using a robotic gripper holding a rigid beaker. As the gripper executes a sequence of operations—specifically "Drag," "Rotate," and "Press"—the sensor seamlessly and simultaneously decodes the 3D interaction forces () and the real-time posture angle of the grasped object. During the "Rotate" phase (from to ), the analytical angle prediction tightly tracks the continuous rotational ground truth (transitioning from approximately 89.1° to 140.5°). The dynamic bimodal stress distributions at specific timestamps (, and ) explicitly visualize the continuous spatial shifting of the contact footprint. Furthermore, during the "Press" phase (after ), despite the introduction of asymmetric external forces () and varying normal loads (), the predicted angle remains exceptionally stable. This demonstrates that the hierarchical decoupling pipeline robustly isolates the geometric orientation from varying force magnitudes.

**S13.2 Generalization Across Diverse Geometries and Materials**

A critical requirement for tactile perception is the ability to handle unstructured objects without object-specific calibration. To demonstrate this algorithmic generalization, the angle detection pipeline was applied to diverse everyday items, including a flexible cable, a thin metallic needle, a rigid Allen key, and a wooden pencil. Despite the extreme disparities in stiffness, surface curvature, and spatial contact area—ranging from the sharp, focused profile of a needle to the soft, extended boundary of a cable—the sensor consistently extracts the bimodal spatial stress poles. The resulting analytical angle estimations (e.g., 43.5°, 131.6°, 50.7°, and 88.9°) align precisely with the physical orientation of the objects. This confirms that the analytical mechanism relies fundamentally on the underlying elastic deformation field rather than memorized visual or tactile patterns, granting the system universal applicability for general grasping tasks.

**S14. Experimental Validation of Vision-Free Manipulation and Retrieval**

This section demonstrates the system's capability to perform complex manipulation tasks in unstructured environments strictly relying on tactile feedback. To simulate scenarios where visual occlusion is absolute, the robotic system was tasked with retrieving various objects from an opaque "black box" without any visual inputs, mimicking the human ability to reach into a blind box and manipulate unknown items.

**S14.1 Task A: Dynamic Tracking for Vision-Free Ball Retrieval**

**Challenge:** The primary difficulty in this task is the requirement for ultra-fast responses to dynamic physical contacts. Grasping a slippery, free-rolling ball inherently induces continuous contact shifts, which can easily lead to grasp failure if the control loop is subjected to sensor latency.

**Methodology:** To address this, the tactile sensor is utilized to continuously extract high-frequency primitive estimations, specifically focusing on the 3D contact force () and the Center of Pressure (CoP, denoted as ). We implemented a closed-loop control policy designed to minimize the spatial deviation () between the real-time CoP and the target geometric center of the sensor array.

**Solution Effect:** The experimental results demonstrate that the hierarchical tactile processing pipeline provides sufficiently rapid feedback to track the rolling ball. By dynamically evaluating the grasp quality based on the CoP shift, the system effectively guides the robotic gripper to perform corrective actions, successfully stabilizing the rolling ball strictly through high-speed tactile reflexes.

**S14.2 Task B: Geometrically Constrained Pen Extraction**

**Challenge:** The second task involves retrieving an elongated object (a pen) whose physical length strictly exceeds the diameter of the box's top aperture. This introduces a severe geometric constraint, necessitating "rich tactile states" to ensure safe interaction. Without vision, forcibly extracting the misaligned pen would result in structural collision and potential hardware damage.

**Methodology:** Overcoming this requires simultaneous and accurate estimation of multiple tactile dimensions: 3D force, CoP, and, most critically, the continuous contact posture angle (). The robotic controller uses these comprehensive states to execute rapid collision detection and trigger online posture adjustment protocols.

**Solution Effect:** As the robot attempts to lift the pen, the sensor immediately detects the abnormal resistance force and torque indicating a collision with the aperture rim. Utilizing the real-time posture angle () feedback, the robotic arm automatically and dynamically reorients the grasped pen, continually adjusting its angle until it seamlessly aligns with the extraction hole. This demonstrates the sensor's capacity to guide complex, obstacle-avoidance manipulation entirely through high-fidelity, multi-dimensional tactile perception.

**S15. Demonstration of Long-Horizon Dual-Arm Assembly Task**

This section details the deployment of the tactile sensor array in a complex, long-horizon dual-arm assembly task. The experiment requires the robotic system to manipulate a diverse set of heterogeneous, unstructured objects—including multi-scale bolts, Allen keys, and screwdrivers—to assemble 3D-printed components on a wooden base, remarkably without any object-specific pre-training or visual markers.

**S15.1 Hierarchical Visuo-Tactile Control Framework**

To execute this long-horizon task, we implemented a hierarchical visuo-tactile control framework that seamlessly integrates global visual planning with local tactile reflexes. A global vision system (RGB-D camera) operates in the slow outer loop, providing coarse estimations to generate visual target poses () and baseline reference trajectories (). However, vision is inherently limited by occlusion and lacks physical interaction data. Therefore, once physical contact is established—triggered by the tactile normal force exceeding a predefined threshold ()—the system dynamically activates the Tactile Intelligence Module. This inner loop operates at a high frequency (>80 Hz), rapidly decoding the raw tactile stream into analytical primitives: 3D force, Center of Pressure (CoP), and contact posture. These primitives are continuously fed into a reactive correction policy to compute real-time spatial () and angular () compensations, guaranteeing the precise execution of outer-loop commands entirely through tactile guidance.

**S15.2 Zero-Shot Generalization and Tactile Proprioception**

The dual-arm assembly process successfully overcomes several critical manipulation challenges typically associated with heterogeneous objects. First, during the grasping phase, the robot frequently experiences severe visual occlusion caused by its own end-effector. Relying on high-fidelity tactile proprioception, the system accurately reconstructs the in-hand object's posture (e.g., extracting precise angles such as or ) completely independent of the camera. Second, the framework demonstrates powerful zero-shot generalization across varying textures and geometries. Regardless of whether the gripper holds a smooth metallic Allen key or a threaded bolt in a random initial orientation, the adaptive control policy utilizes real-time angle estimations to execute complex in-hand manipulations, such as friction-driven pivoting, actively reorienting the objects to their target functional angles ().

**S15.3 Robust Tactile-Guided Alignment and Insertion**

The final and most challenging phase of the assembly involves the precise insertion of fasteners into tight-tolerance holes. Purely vision-based or position-controlled insertions frequently fail due to minute calibration errors, leading to structural jamming. In our framework, when a geometric misalignment occurs between a bolt and its target hole, the tactile sensor instantaneously detects the anomalous contact state, characterized by high multi-axis shear forces (). Utilizing this localized 3D force feedback, the controller immediately halts the downward motion (retracts) and executes a precise spatial repositioning maneuver (). This tactile-guided search continues iteratively until the abnormal shear forces are nullified, culminating in a stable, successful insertion characterized by a uniform, low Z-axis penetration force and minimal lateral resistance.


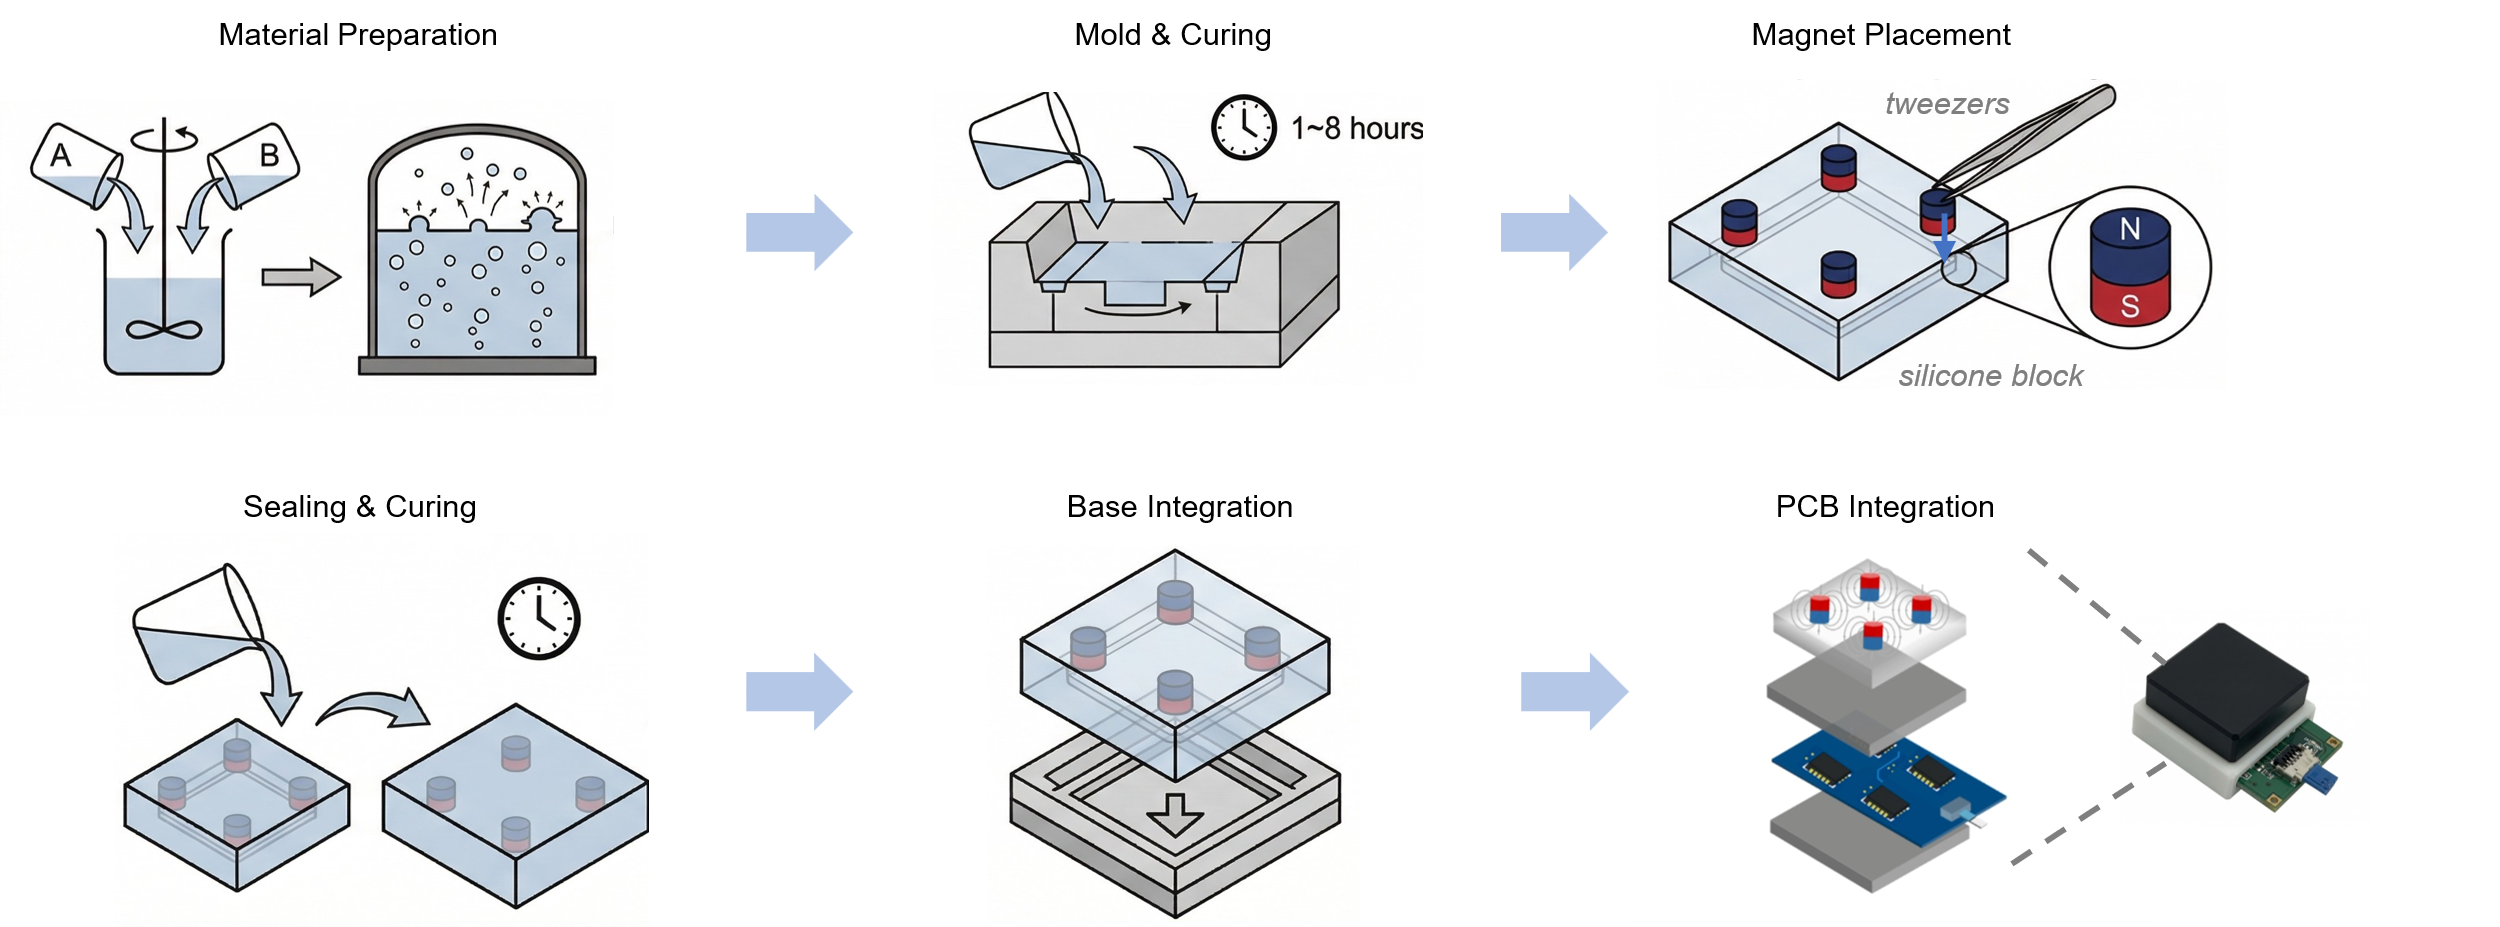


**Fig. S1. Fabrication and assembly process of the soft magnetic tactile sensor.** The manufacturing workflow comprises six key steps: (1) **Material Preparation:** Mixing Dragon Skin 30 silicone (parts A and B) and vacuum degassing to eliminate internal air bubbles. (2) **Mold & Curing:** Pouring the liquid elastomer into a precision mold and curing for 1 to 8 hours to form the base structure with cavities. (3) **Magnet Placement:** Precisely embedding four cylindrical permanent magnets into the pre-molded cavities with strictly defined pole orientations. (4) **Sealing & Curing:** Re-pouring silicone to fully encapsulate the magnets, followed by a secondary curing phase to form a monolithic block. (5) **Base Integration:** Bonding the cured magnetic elastomer block to a custom rigid base structure. (6) **PCB Integration:** Assembling the printed circuit board (PCB) into the base to ensure strict vertical alignment between the embedded magnets and the corresponding Hall-effect sensors.


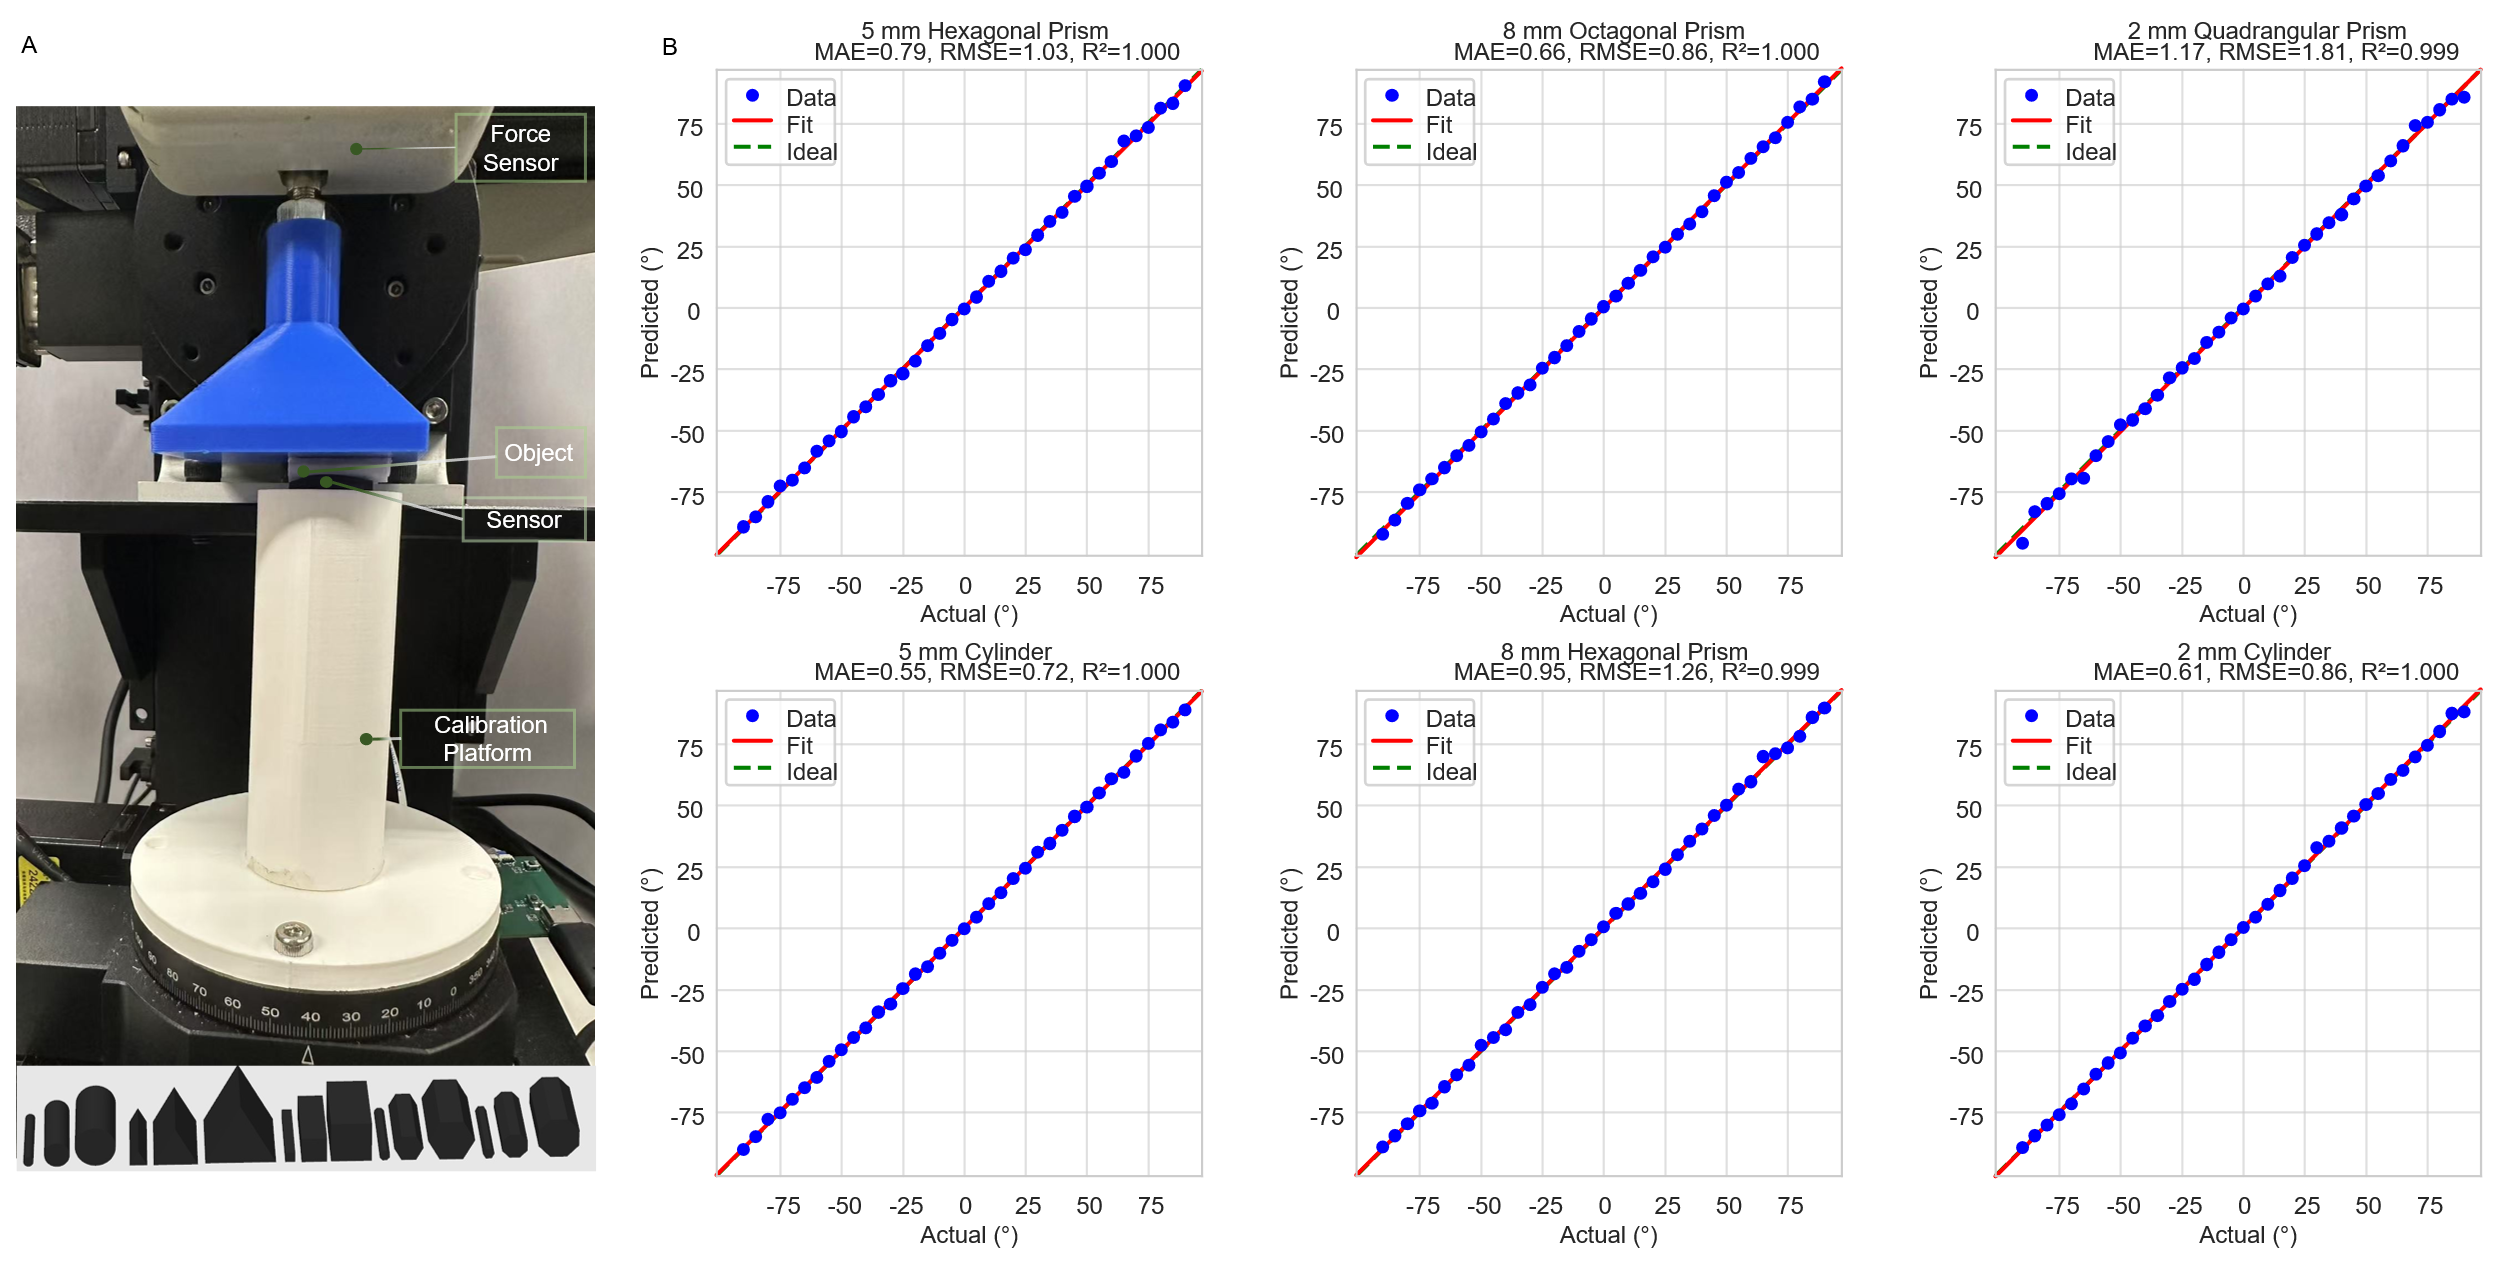


**Fig. S2. Angle detection calibration experiment and representative test objects.** (**A**) Experimental setup. The apparatus features a precision linear actuator to control the contact motion, a rotary stage to establish the ground-truth rotation angle, and a custom gripper holding the test object against the tactile sensor. (**B**) Representative test objects for angle calibration (8 out of 15 shown). The test set consists of fundamental geometric primitives with varying cross-sections and scales. Examples include square, hexagonal, rectangular (with varying aspect ratios), triangular, octagonal, semi-cylindrical, and rounded rectangular profiles.


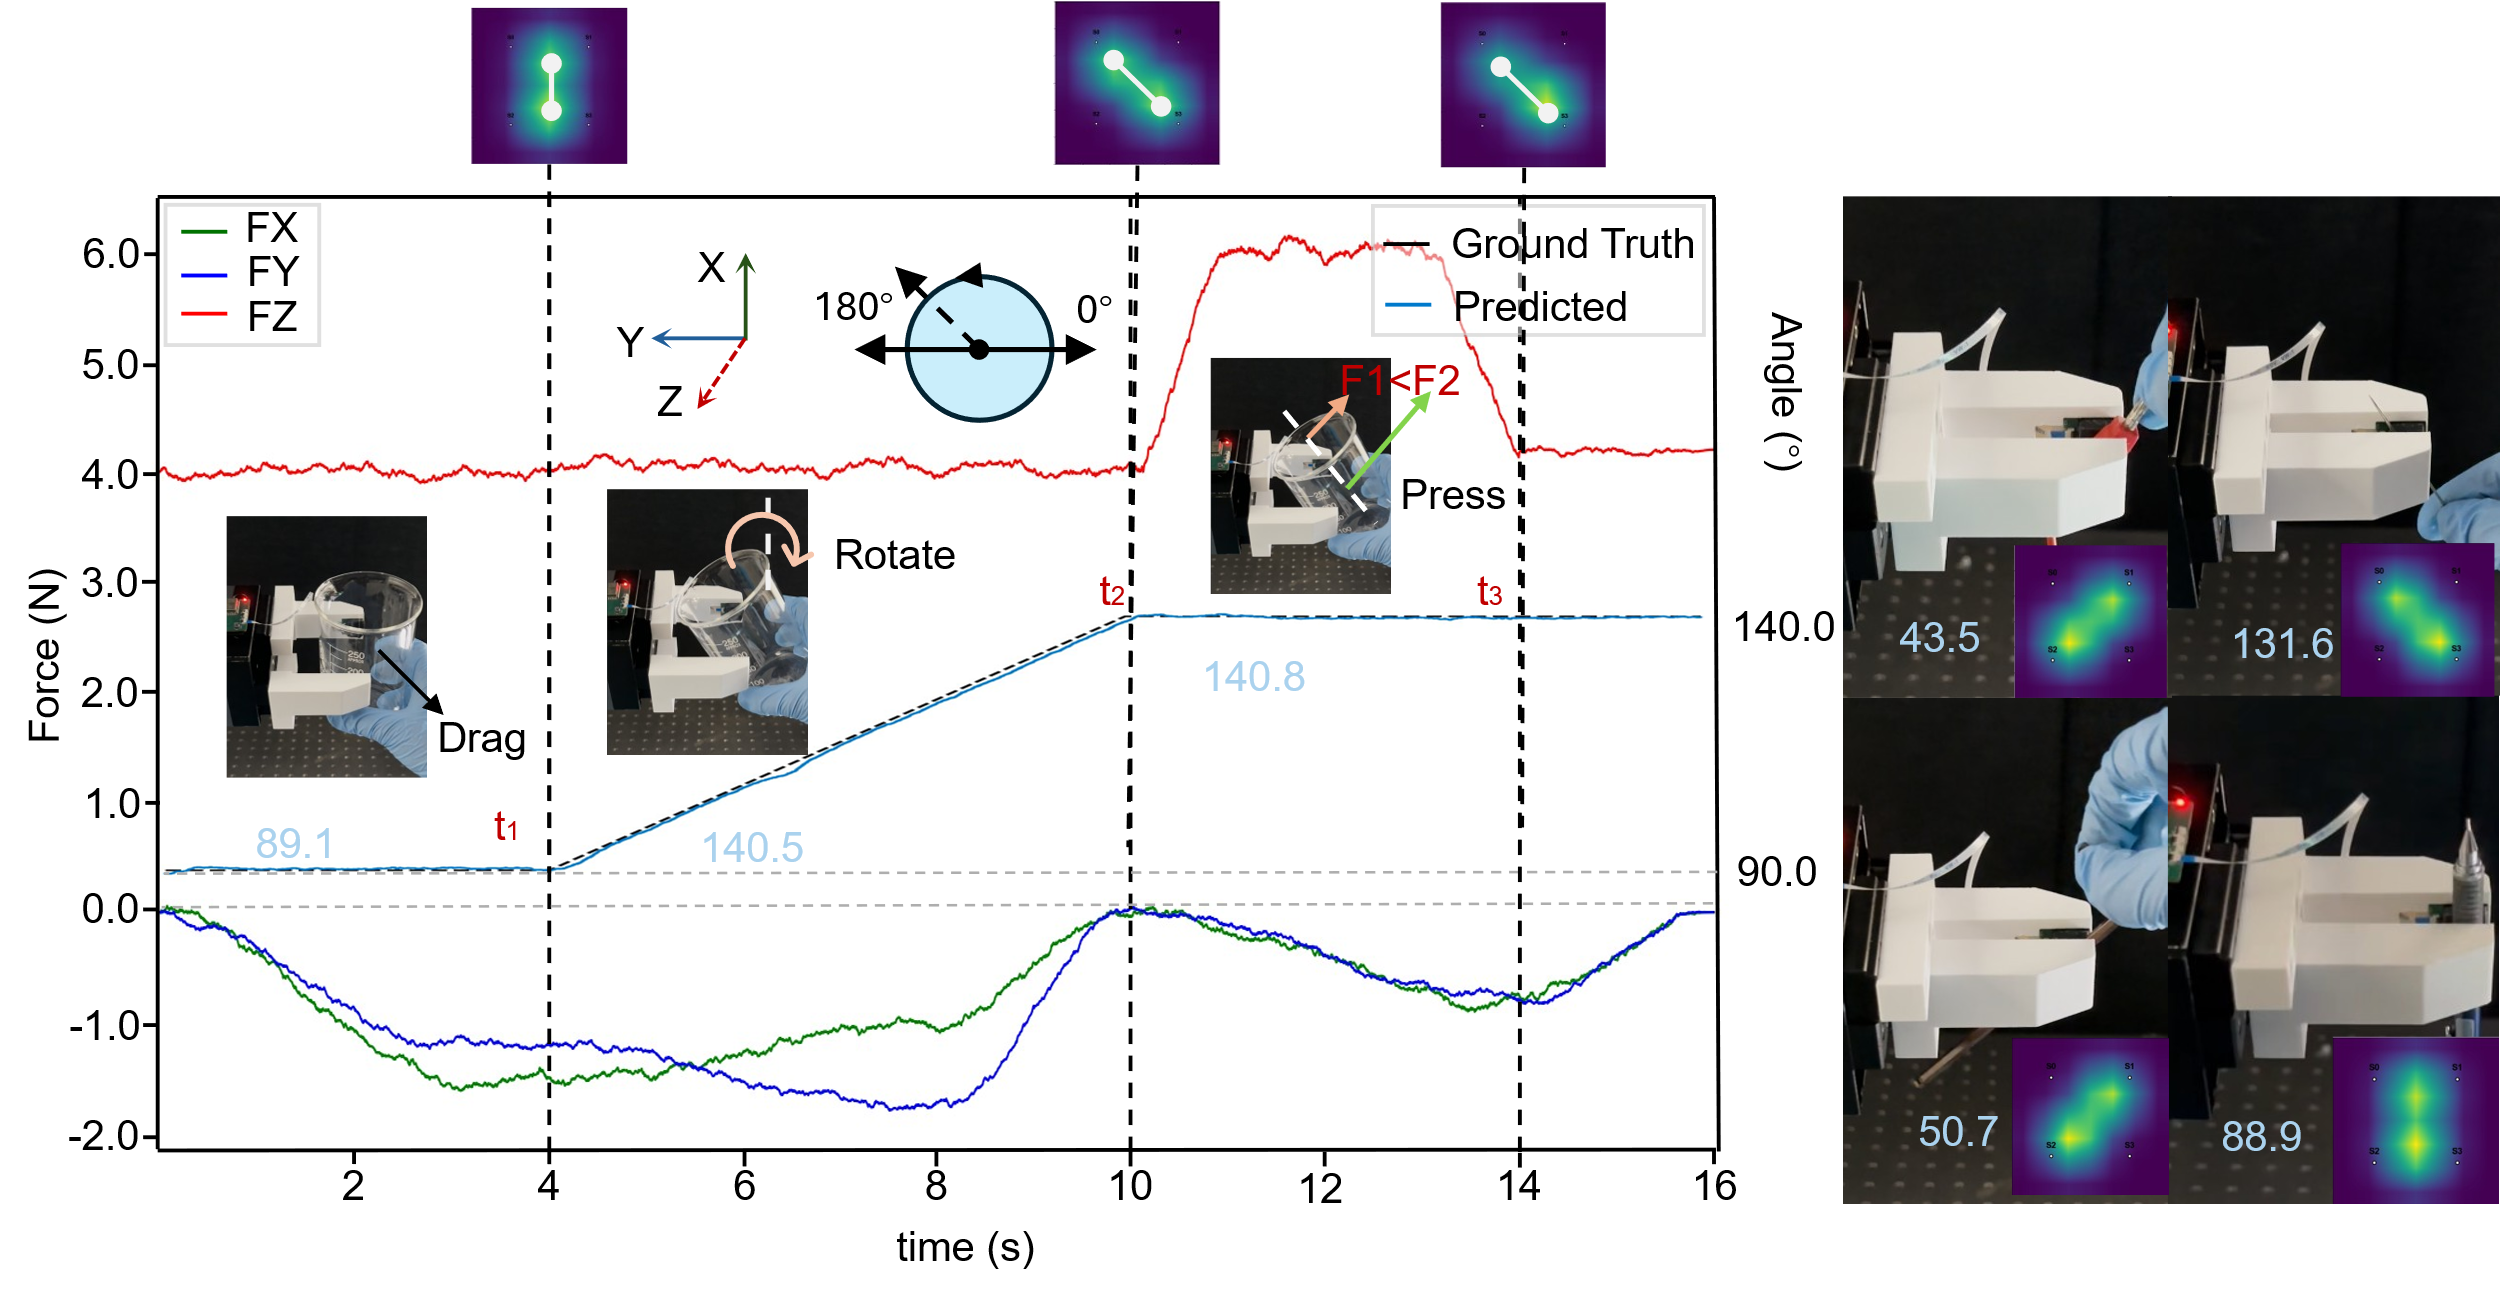
**Fig. S3. Dynamic manipulation and generalized angle estimation across diverse objects.** (Left) Real-time continuous monitoring of decoupled 3D contact forces () and object orientation during a complex manipulation sequence (Drag, Rotate, Press) of a beaker. The predicted angle tightly tracks the ground truth during continuous rotation. The top insets visualize the corresponding bimodal stress fields at specific timestamps (). (Right) Generalization of the angle detection pipeline across diverse everyday objects, including a flexible cable, a metallic needle, an Allen key, and a pencil. The sensor robustly extracts the contact footprints (shown in the insets) and accurately outputs the estimated angles regardless of the objects' inherent geometries, spatial dimensions, or material stiffness.

**Table S1. Contact localization accuracy under varying normal loads.**
Performance metrics are reported as the Mean Absolute Error (MAE) per dimension and the combined Root Mean Square Error (RMSE) of the contact localization pipeline across 289 grid points per load condition (coordinate range: 2.0 ≤ X, Y ≤ 10.0 mm).

| **Normal Load (N)** | **MAE per Dimension (mm)** | **Localization RMSE (mm)** |
| --- | --- | --- |
| 2 | 0.1446 | 0.2556 |
| 5 | 0.1012 | 0.1822 |
| 8 | 0.0813 | 0.1534 |
|  |  |  |

**Table S2A. Angle detection MAE summarized by converted angle range.**

MAE values are reported after converting all measured angles to the 0–180° range across all 15 test objects and all ground-truth orientations (0° to 360° in 10° increments).

| **Angle Range (°)** | **MAE (°)** |
| --- | --- |
| **0–10** | **0.417** |
| **10–20** | **0.400** |
| **20–30** | **0.833** |
| **30–40** | **0.800** |
| **40–50** | **1.417** |
| **50–60** | **0.583** |
| **60–70** | **0.400** |
| **70–80** | **0.550** |
| **80–90** | **0.467** |
| **90–100** | **0.533** |
| **100–110** | **0.450** |
| **110–120** | **0.533** |
| **120–130** | **0.933** |
| **130–140** | **1.283** |
| **140–150** | **1.383** |
| **150–160** | **0.150** |
| **160–170** | **0.167** |
| **170–180** | **0.133** |

**Table S2B. Angle detection MAE summarized by object model.**

Each value represents the mean absolute error averaged over all tested orientations (0° to 360° in 10° increments) for the corresponding object.

| **Object Model** | **MAE (°)** |
| --- | --- |
| **2 mm Cylinder** | **0.600** |
| **2 mm Quadrangular Prism** | **0.763** |
| **5 mm Cylinder** | **0.626** |
| **5 mm Hexagonal Prism** | **0.789** |
| **8 mm Hexagonal Prism** | **0.468** |
| **8 mm Octagonal Prism** | **0.384** |

**Table S2C. Overall angle detection statistics across all objects and orientations.**

Statistics are computed over all 15 test objects across the full 0–360° sweep with 10° increments, after converting angles to the 0–180° range.

| **Metric** | **Value (°)** |
| --- | --- |
| **Maximum average error** | **1.417** |
| **Minimum average error** | **0.067** |
| **Overall mean absolute error** | **0.605** |
| **Standard deviation** | **0.398** |
